# Supplementary material for: Synthesis and characterization of poly(tetraphenylimidazole)s and their application in the detection of fluoride ions
Source: Royal Society of Chemistry journal article supplement (doi:10.1039/d0ra01559h), 2020-01-01
Supplement: d0ra01559h1.pdf [file d0ra01559h1.pdf]

## Synthesis and characterization of poly(tetraphenylimidazole)s and their application in the detection of fluoride ions

Basava Punna Rao Aradhyula<sup>#</sup>, Ramu V. Ranga Naidu Chinta<sup>#</sup>, Kunchala Dhanunjayarao and  
Krishnan Venkatasubbaiah<sup>\*</sup>

School of Chemical Sciences, National Institute of Science Education and Research (NISER),  
Bhubaneswar, HBNI, Bhubaneswar-752050, Odisha (India). E-mail: krishv@niser.ac.in

<sup>#</sup> RPRA & RVRNC contributed equally

### Table of Contents

|                                                                                                                                                                                                     |            |
|-----------------------------------------------------------------------------------------------------------------------------------------------------------------------------------------------------|------------|
| Experimental procedure-General and Synthesis of compound <b>1</b>                                                                                                                                   | <b>S2</b>  |
| Table S1: Crystal data and structure refinement parameters for compound <b>3</b>                                                                                                                    | <b>S3</b>  |
| Table S2: Molecular weight and thermal data for polymers                                                                                                                                            | <b>S3</b>  |
| Figure S1: <sup>1</sup> H NMR spectrum of compound <b>2</b>                                                                                                                                         | <b>S4</b>  |
| Figure S2: <sup>13</sup> C NMR spectrum of compound <b>2</b>                                                                                                                                        | <b>S4</b>  |
| Figure S3: HR-MS data of compound <b>2</b>                                                                                                                                                          | <b>S5</b>  |
| Figure S4: <sup>1</sup> H NMR spectrum of compound <b>3</b>                                                                                                                                         | <b>S5</b>  |
| Figure S5: <sup>13</sup> C NMR spectrum of compound <b>3</b>                                                                                                                                        | <b>S6</b>  |
| Figure S6: HR-MS data of compound <b>3</b>                                                                                                                                                          | <b>S6</b>  |
| Figure S7: <sup>1</sup> H NMR spectrum of homo-polymer (probe <b>I</b> )                                                                                                                            | <b>S7</b>  |
| Figure S8: <sup>13</sup> C NMR spectrum of homo-polymer (probe <b>I</b> )                                                                                                                           | <b>S7</b>  |
| Figure S9: <sup>1</sup> H NMR spectrum of co-polymer (probe <b>II</b> )                                                                                                                             | <b>S8</b>  |
| Figure S10: <sup>13</sup> C NMR spectrum of co-polymer (probe <b>II</b> )                                                                                                                           | <b>S8</b>  |
| Figure S11: GPC traces of the (a) homopolymer (probe <b>I</b> ) (b) Copolymer (probe <b>II</b> ) and (c) comparison of retention time of both the probes                                            | <b>S9</b>  |
| Figure S12: Fluorescence response of both the probes (10 μmol) (a) Probe <b>I</b> (homopolymer) and (b) Probe <b>II</b> (copolymer) with equi molar fluoride ion (10 μmol) over a period of 60 min. | <b>S9</b>  |
| Figure S13: Fluorescence response of both probes (10 μmol) towards various analytes in THF solution                                                                                                 | <b>S10</b> |
| Figure S14: <sup>1</sup> H NMR titration spectrum of Homopolymer (probe <b>I</b> )                                                                                                                  | <b>S10</b> |
| Figure S15: <sup>1</sup> H NMR titration spectrum of copolymer (probe <b>II</b> )                                                                                                                   | <b>S11</b> |
| Figure S16: Thermogravimetric analysis traces of probe <b>I</b> & <b>II</b> recorded under nitrogen at a heating rate of 20 °C/min.                                                                 | <b>S11</b> |
| Figure S17: UV-Vis and emission spectra of monomer and the probes <b>I</b> & <b>II</b> in THF solution at different interval of time.                                                               | <b>S12</b> |
| Figure S18: Emission spectra of probes <b>I</b> & <b>II</b> along with different ions in THF solution at different three different temperatures.                                                    | <b>S13</b> |
| Figure S19: Emission spectra of probes <b>I</b> & <b>II</b> along with different ions in THF solution at different concentrations.                                                                  | <b>S14</b> |
| Figure S20: HPLC trace of compound <b>3</b>                                                                                                                                                         | <b>S15</b> |

## Experimental Section

**General:** Solvents and other general reagents were purified according to standard procedures. Benzil, 4-bromoaniline, 4-vinylphenylboronic acid, di(ethylene glycol) methyl ether methacrylate and ammonium acetate were purchased from Sigma-Aldrich. 1,8-Diazabicyclo [5.4.0]undec-7-ene (DBU), tert-butyl(chloro)diphenylsilane and salicylaldehyde were purchased from Alfa-Aesar. Glacial acetic acid and 2,2'-azobis(isobutyronitrile) were obtained from Spectrochem. All 400 MHz  $^1\text{H}$ , 100 MHz  $^{13}\text{C}$ , and 79 MHz  $^{29}\text{Si}$  spectra were recorded on a Bruker ARX 400 spectrometer operating at 400 MHz. All  $^1\text{H}$  and  $^{13}\text{C}$  NMR spectra were referenced internally to solvent signals.  $^{29}\text{Si}$  NMR spectra were referenced externally to TMS in  $\text{CDCl}_3$  ( $\delta = 0$ ). All NMR spectra were recorded at ambient temperature. Elemental analyses were carried out by using a Thermo quest CE instrument model EA/110 CHNS-O elemental analyzer. ESI mass spectra were recorded on a Bruker, microTOF-QII mass spectrometer. The absorbance spectra were recorded on JASCO V-730 UV-visible spectrometer. The fluorescence spectra were recorded using Edinburgh FS5 spectrofluorometer. The fluorescence spectra were corrected for the instrumental response. Single-crystal X-ray diffraction data was collected on a Rigaku Oxford X-ray diffractometer. The data was collected at 293 K using  $\text{Cu-K}\alpha$  radiation (1.54184 Å). Crystallographic data for **3**, details of X-ray diffraction experiments and crystal structure refinements are given in Table S1. The structures were solved and refined with SHELX suite of programs. All non-hydrogen atoms were refined with anisotropic displacement coefficients. The H atoms were placed at calculated positions and were refined as riding atoms. Crystallographic data for the structure **3** has been deposited with the Cambridge Crystallographic Data Center as supplementary publication no. CCDC- 1975843. Copies of the data can be obtained free of charge on application to CCDC, 12 Union Road, Cambridge CB2 1EZ, UK (fax: (+44) 1223-336-033; email: deposit@ccdc.cam.ac.uk).

### *Synthesis of 2-(1-(4-bromophenyl)-4,5-diphenyl-1H-imidazol-2-yl)phenol (1):*

Benzil (3.00 g, 14.27 mmol) and salicylaldehyde (1.49 mL, 14.27 mmol) were taken in acetic acid, to this mixture 4-Bromo aniline (2.7 g, 15.69 mmol) and ammonium acetate (1.65 g, 21.40 mmol) were added subsequently and refluxed for 24 h. Later the reaction mixture was cooled to room temperature and then water was added, the obtained precipitate was collected by filtration. The white solid was recrystallized from ethyl acetate to get the pure product. Yield: 4.6 g, 69 %.  $^1\text{H}$  NMR (400 MHz,  $\text{CDCl}_3$ ):  $\delta$  6.59 (t,  $J = 8$  Hz, 1H), 6.7 (d,  $J = 8$  Hz, 1H), 7.03 – 7.21 (m, 6H), 7.22 – 7.27 (m, 2H), 7.29 – 7.40 (m, 4H), 7.49 (d,  $J = 8.0$  Hz, 2H), 7.56 (d,  $J =$

8 Hz, 2H);  $^{13}\text{C}$  NMR (101 MHz,  $\text{CDCl}_3$ ):  $\delta$  76.71, 77.02, 77.34, 118.16, 118.45, 123.48, 127.21, 127.67, 128.45, 128.82, 129.03, 129.99, 130.25, 131.27, 132.82, 144.60, 158.00; HR-MS (ESI): calcd. for  $\text{C}_{27}\text{H}_{19}\text{N}_2\text{OBr}$  ( $[\text{M} + \text{H}]^+$ ): 467.0754, found: 467.0761.

**Table S1:** Crystal data and structure refinement parameters for compound **3**.

|                                                | <b>3</b>                                                      |
|------------------------------------------------|---------------------------------------------------------------|
| Empirical formula                              | $\text{C}_{51}\text{H}_{44}\text{N}_2\text{OSi}$              |
| Formula weight                                 | 728.97                                                        |
| Temperature/K                                  | 293(2)                                                        |
| Crystal system                                 | monoclinic                                                    |
| Space group                                    | $\text{P2}_1/\text{c}$                                        |
| $a/\text{\AA}$                                 | 14.7258(2)                                                    |
| $b/\text{\AA}$                                 | 17.0253(2)                                                    |
| $c/\text{\AA}$                                 | 17.5571(3)                                                    |
| $\alpha/^\circ$                                | 90                                                            |
| $\beta/^\circ$                                 | 105.6548(18)                                                  |
| $\gamma/^\circ$                                | 90                                                            |
| Volume/ $\text{\AA}^3$                         | 4238.49(13)                                                   |
| Z                                              | 4                                                             |
| $\rho_{\text{calc}}/\text{cm}^{-3}$            | 1.142                                                         |
| $\mu/\text{mm}^{-1}$                           | 0.777                                                         |
| F(000)                                         | 1544.0                                                        |
| Radiation                                      | $\text{CuK}\alpha$ ( $\lambda = 1.54184$ )                    |
| 2 $\theta$ range for data collection/ $^\circ$ | 6.234 to 148.984                                              |
| Index ranges                                   | $-18 \leq h \leq 18, -21 \leq k \leq 15, -19 \leq l \leq 21$  |
| Reflections collected                          | 25771                                                         |
| Independent reflections                        | 8533 [ $R_{\text{int}} = 0.0317, R_{\text{sigma}} = 0.0275$ ] |
| Data/restraints/parameters                     | 8533/0/507                                                    |
| Goodness-of-fit on $F^2$                       | 1.087                                                         |
| Final R indexes<br>[ $I \geq 2\sigma(I)$ ]     | $R_1 = 0.0535, wR_2 = 0.1564$                                 |
| Final R indexes [all data]                     | $R_1 = 0.0601, wR_2 = 0.1627$                                 |
| Largest diff. peak/hole / $\text{e \AA}^{-3}$  | 0.29 and -0.30                                                |

**Table S2:** Molecular weight and thermal data for polymers

| Polymer      | $M_n^a$ Da | $M_w^a$ Da | Z+1   | $\bar{D}^a$ | PDT, $^\circ\text{C}$ | $T_g$ , $^\circ\text{C}$ |
|--------------|------------|------------|-------|-------------|-----------------------|--------------------------|
| Homo polymer | 6665       | 16750      | 50787 | 2.51        | 320                   | 155                      |
| Co polymer   | 13058      | 25457      | 65450 | 1.95        | 380                   | 120                      |

$^a$ GPC-RI in THF vs polystyrene standards,  $\bar{D}$  – polydispersity index ( $\bar{D} = M_w/M_n$ ), PDT – polymer decomposition temperature,  $T_g$  – glass transition temperature.

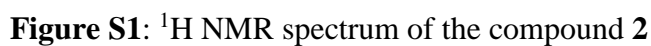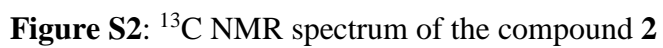

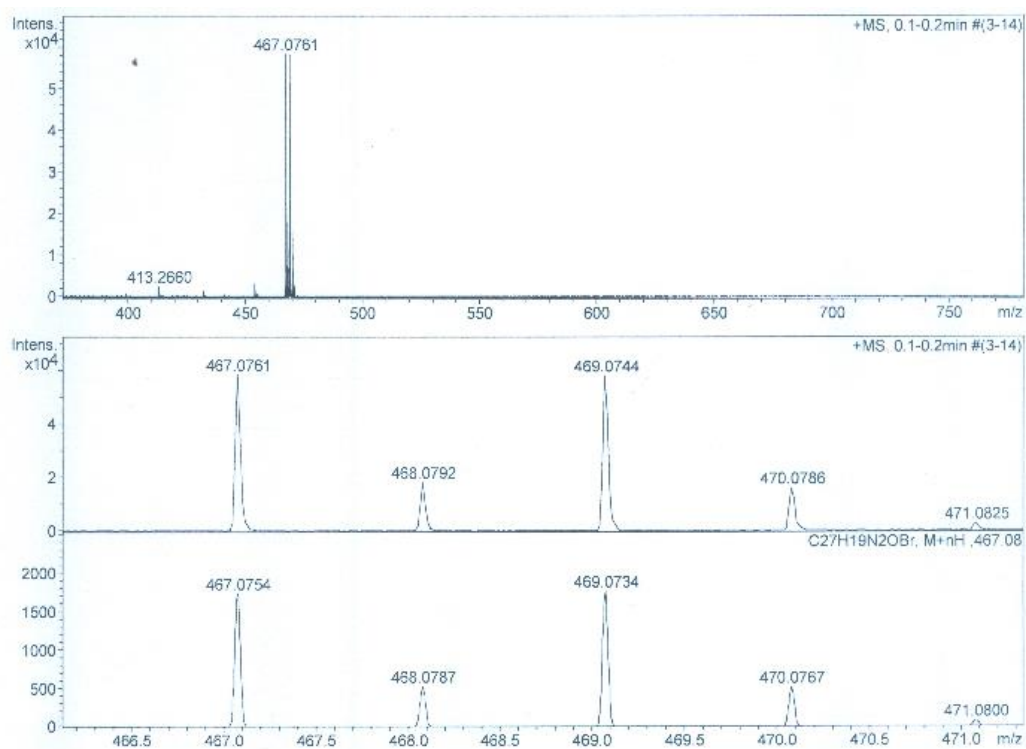

**Figure S3:** HR-MS data of the compound 2

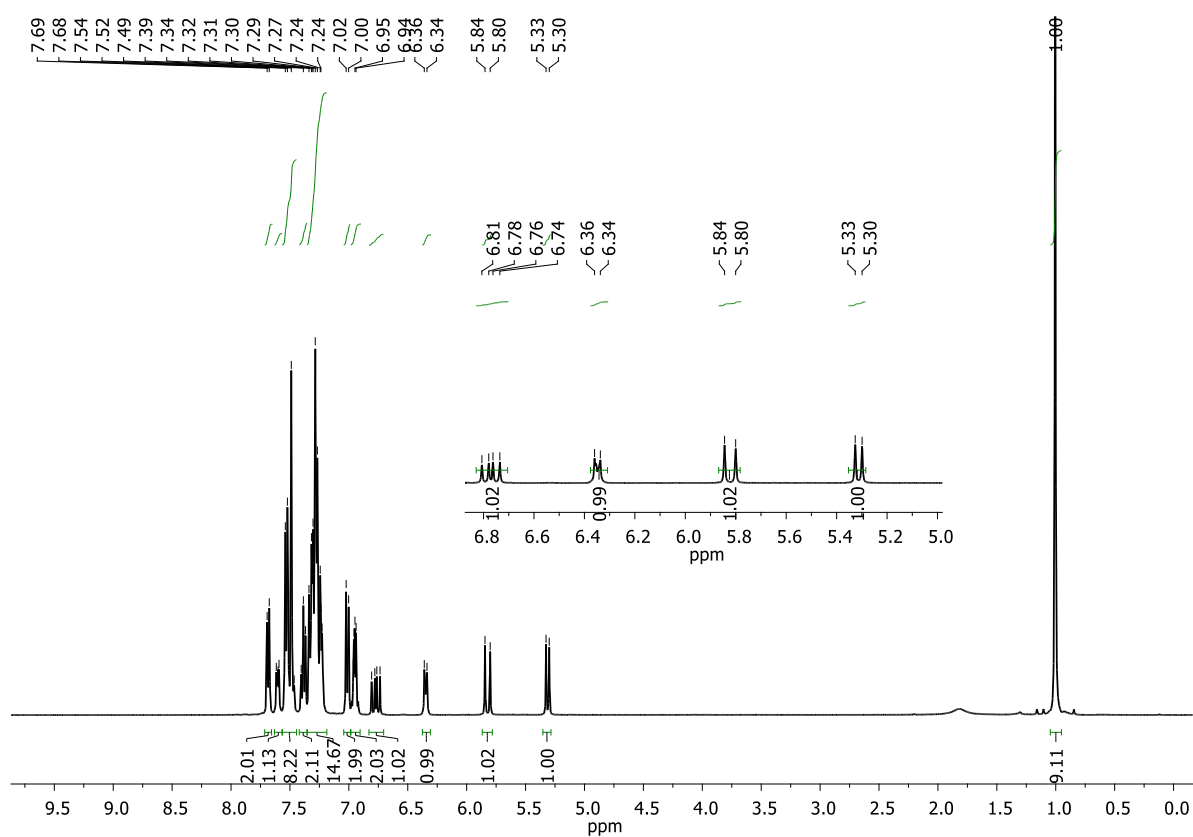

**Figure S4:**  $^1\text{H}$  NMR spectrum of the silyl protected monomer (compound 3)

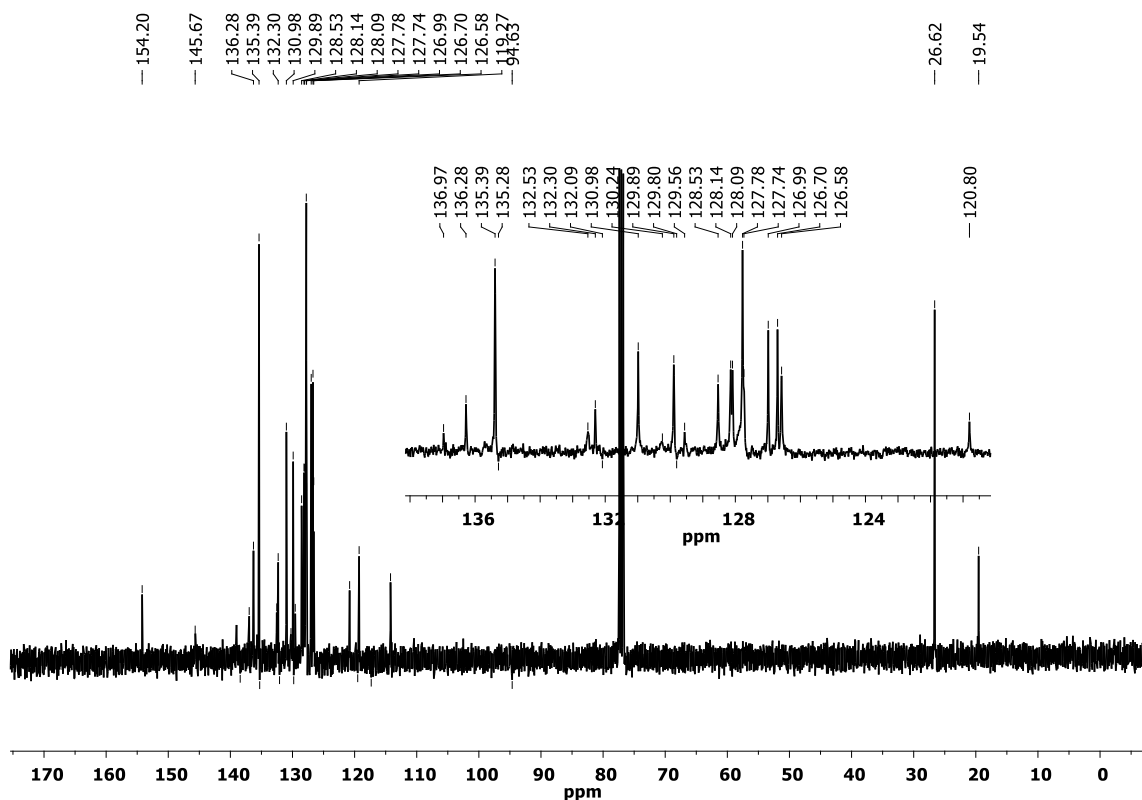

**Figure S5:** <sup>13</sup>C NMR spectrum of the silyl protected monomer (compound 3)

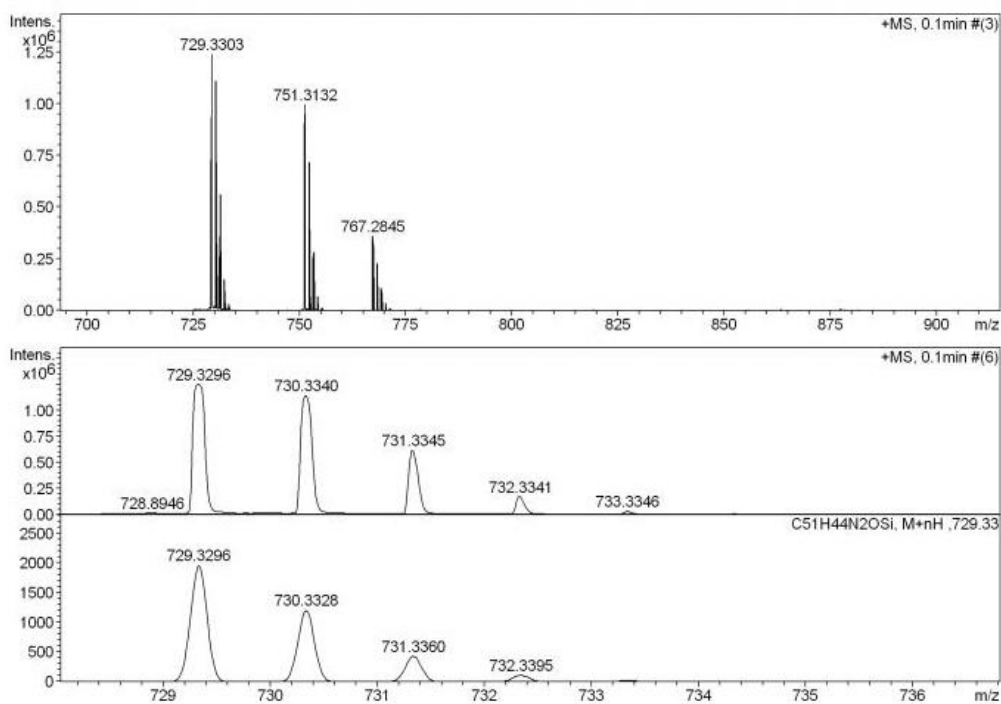

**Figure S6:** HR-MS data of the compound 3

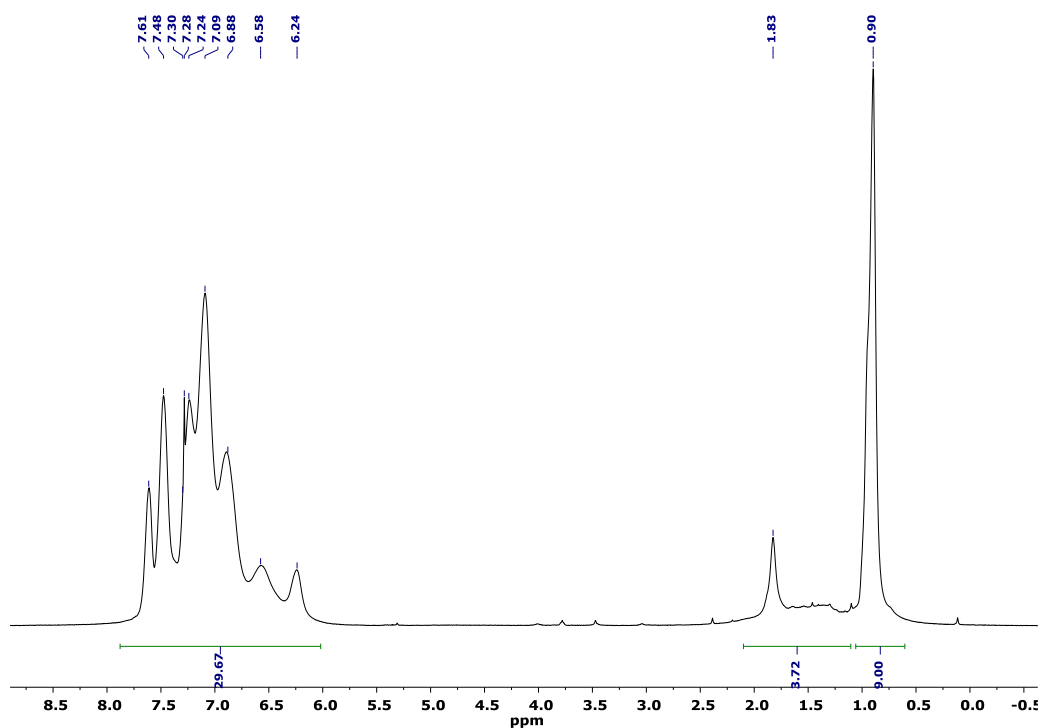

**Figure S7:** <sup>1</sup>H NMR spectrum of the homo-polymer (probe I)

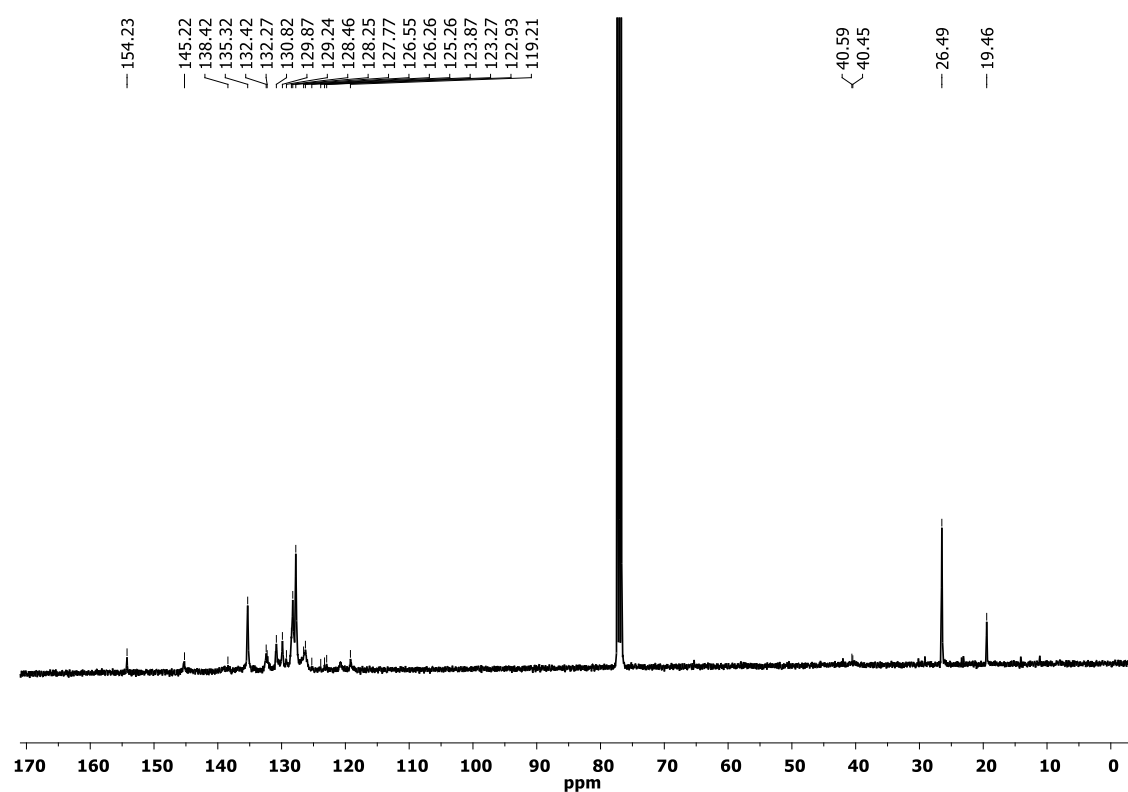

**Figure S8:** <sup>13</sup>C NMR spectrum of the homo-polymer (probe I)

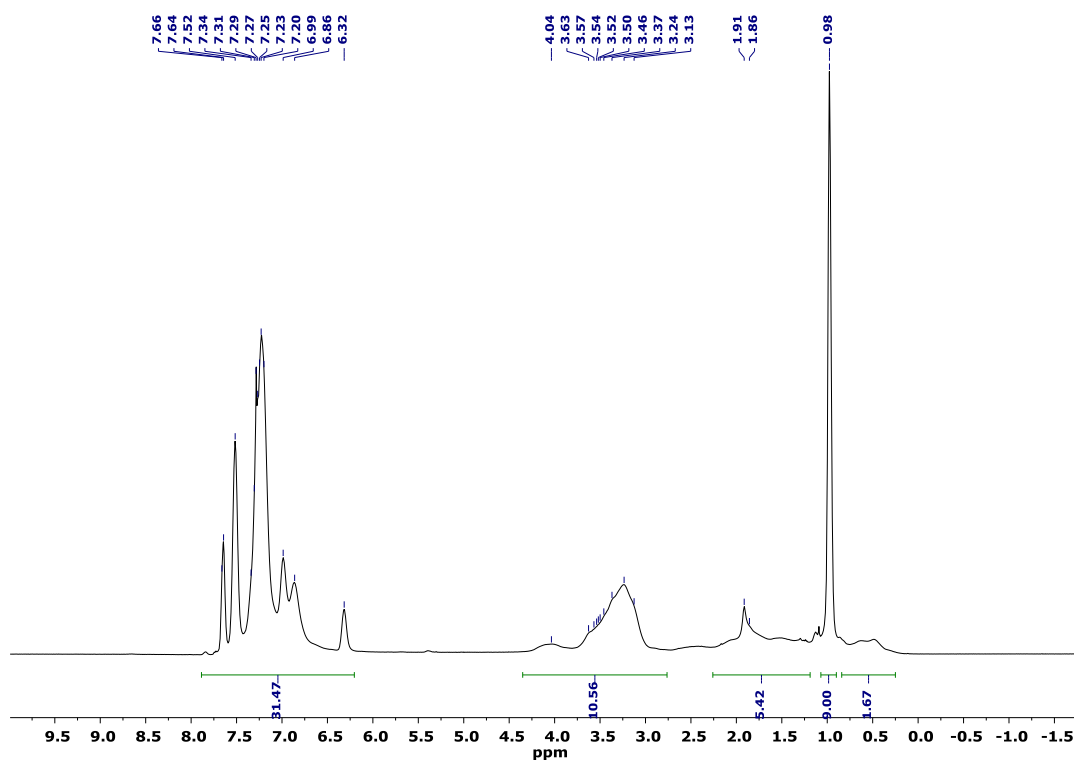

**Figure S9:** <sup>1</sup>H NMR spectrum of the random co-polymer (probe II)

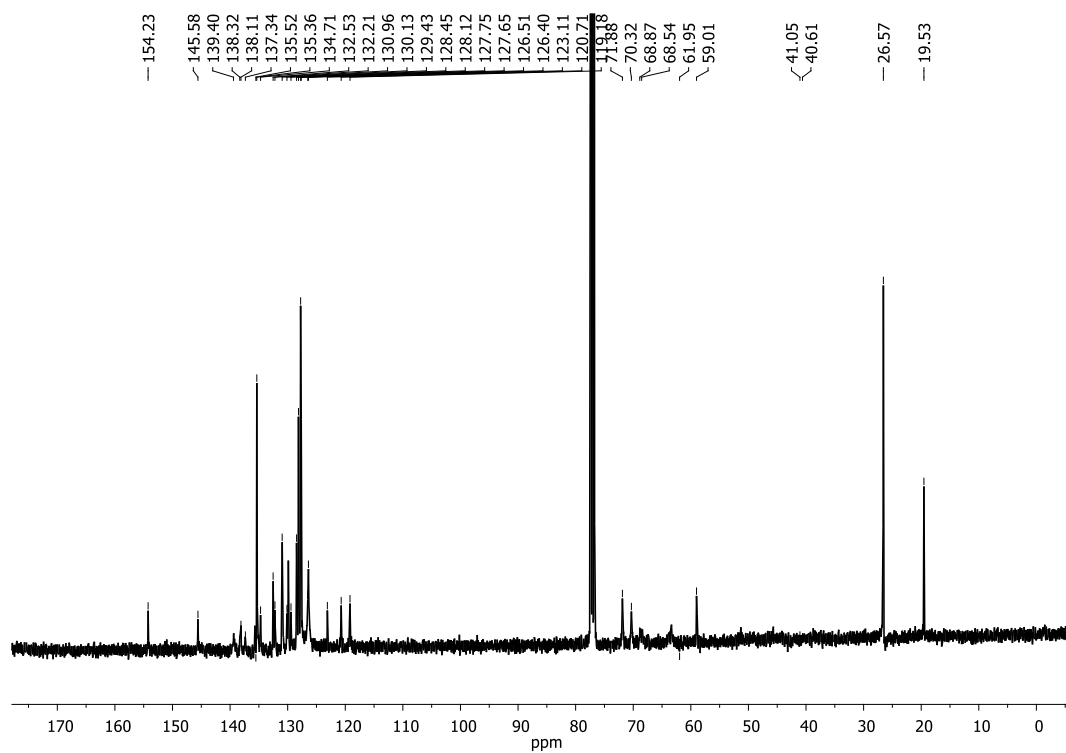

**Figure S10:** <sup>13</sup>C NMR spectrum of the random co-polymer (probe II)



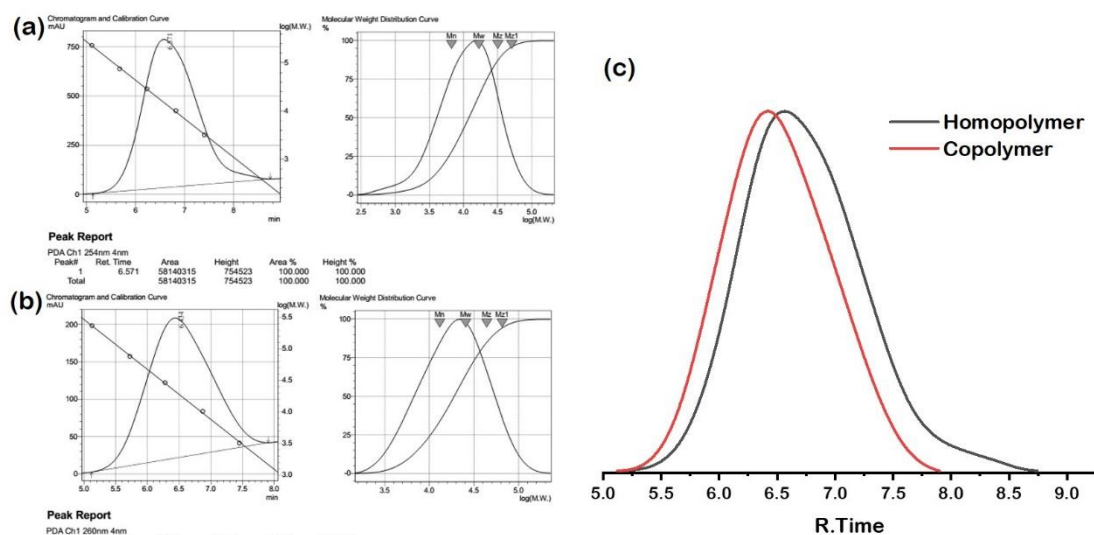

**Figure S11:** GPC traces of the (a) homo-polymer (probe I) (b) random co-polymer (probe II) and (c) comparison of retention time of both the probes, plot represent normalized RI intensities vs elution time, where THF used as eluent and polystyrene standards were used for calibration.

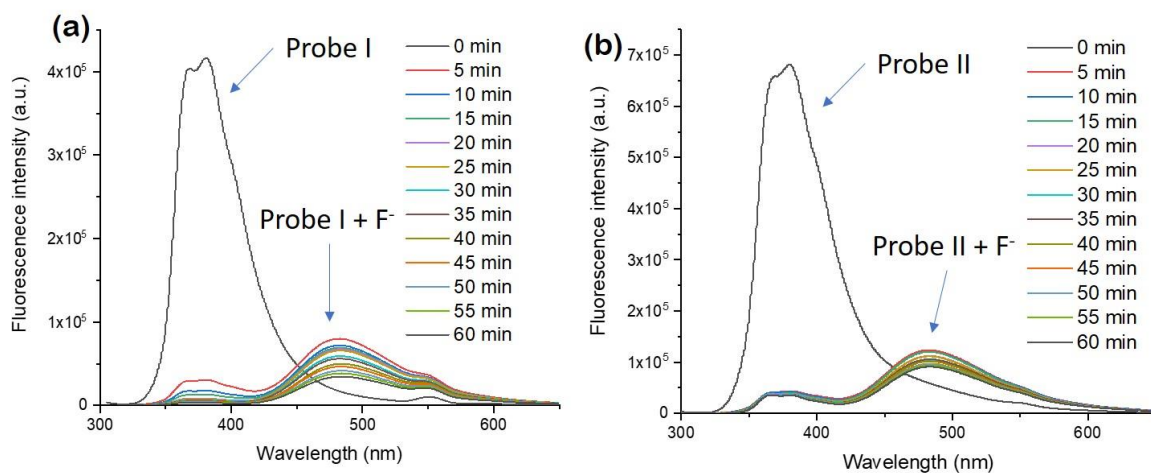

**Figure S12:** Fluorescence response of both the probes (10  $\mu$ mol) (a) Probe I (homo-polymer) and (b) Probe II (random co-polymer) with equi molar fluoride ion (10  $\mu$ mol) over a period of 60 min.

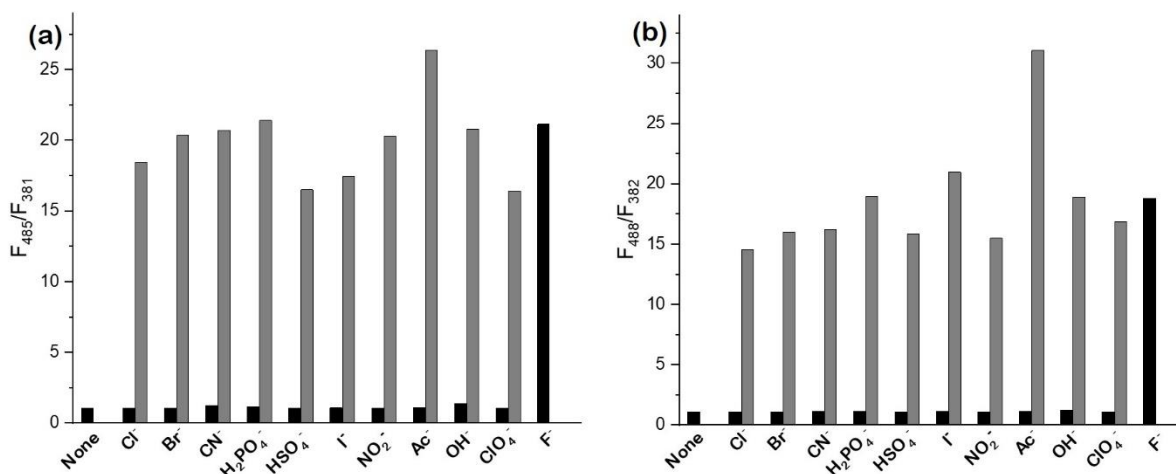

**Figure S13:** Fluorescence response of both probes (10  $\mu$ mol) towards various analytes in THF solution. All the data represents the fluorescence intensity ratio ( $F_{485}/F_{381}$  for probe **I** (left) and  $F_{488}/F_{382}$  for probe **II** (right)). Black bars represent the addition of single analyte including 100  $\mu$ mol anions (Cl<sup>-</sup>, Br<sup>-</sup>, CN<sup>-</sup>, H<sub>2</sub>PO<sub>4</sub><sup>-</sup>, HSO<sub>4</sub><sup>-</sup>, I<sup>-</sup>, NO<sub>2</sub><sup>-</sup>, Ac<sup>-</sup>, OH<sup>-</sup> and ClO<sub>4</sub><sup>-</sup>). Light gray bars represent the subsequent addition of F<sup>-</sup> to the mixture. Each data was obtained after various analytes addition at ambient temperature for 15 min.

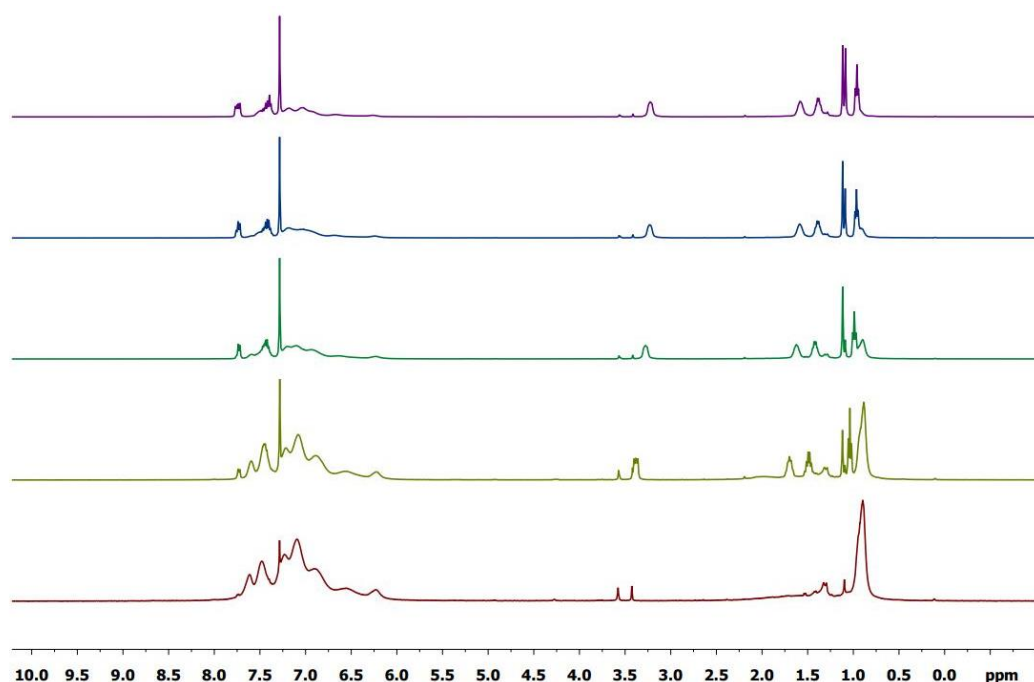

**Figure S14:** <sup>1</sup>H NMR titration spectrum of homo-polymer (probe **I**) 69 mmol with 17, 35, 52 and 69 mmol of fluoride ions in CDCl<sub>3</sub> (bottom to top)

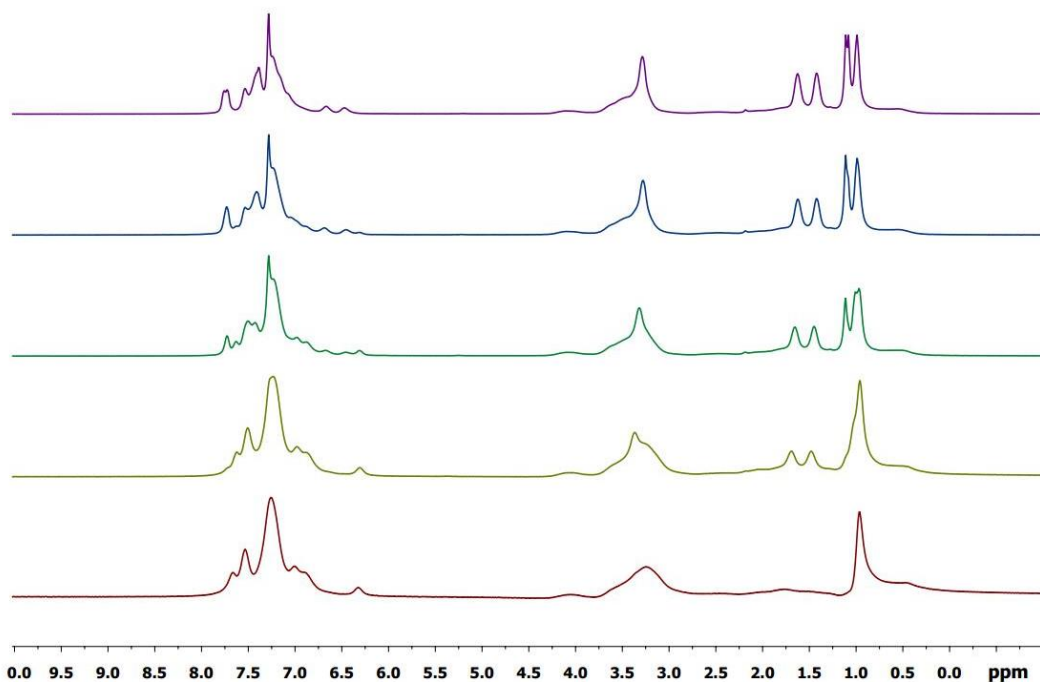

**Figure S15:**  $^1\text{H}$  NMR titration spectrum of random co-polymer (probe **II**) 54 mmol with 14, 28, 42 and 56 mmol of fluoride ions in  $\text{CDCl}_3$  (bottom to top).

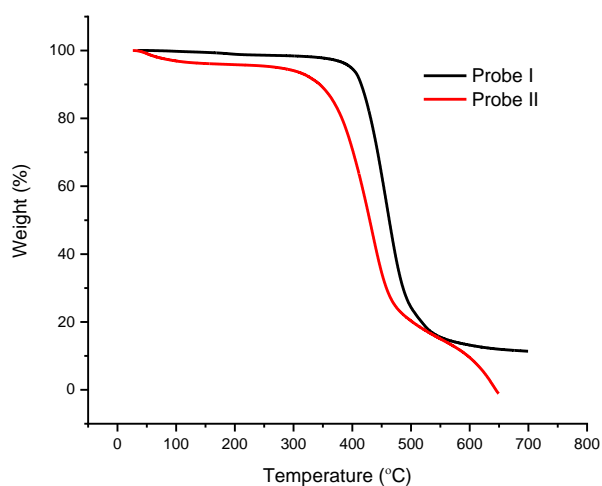

**Figure S16:** Thermogravimetric analysis traces of probe **I** & **II** recorded under nitrogen at a heating rate of  $20\text{ }^\circ\text{C}/\text{min}$ .

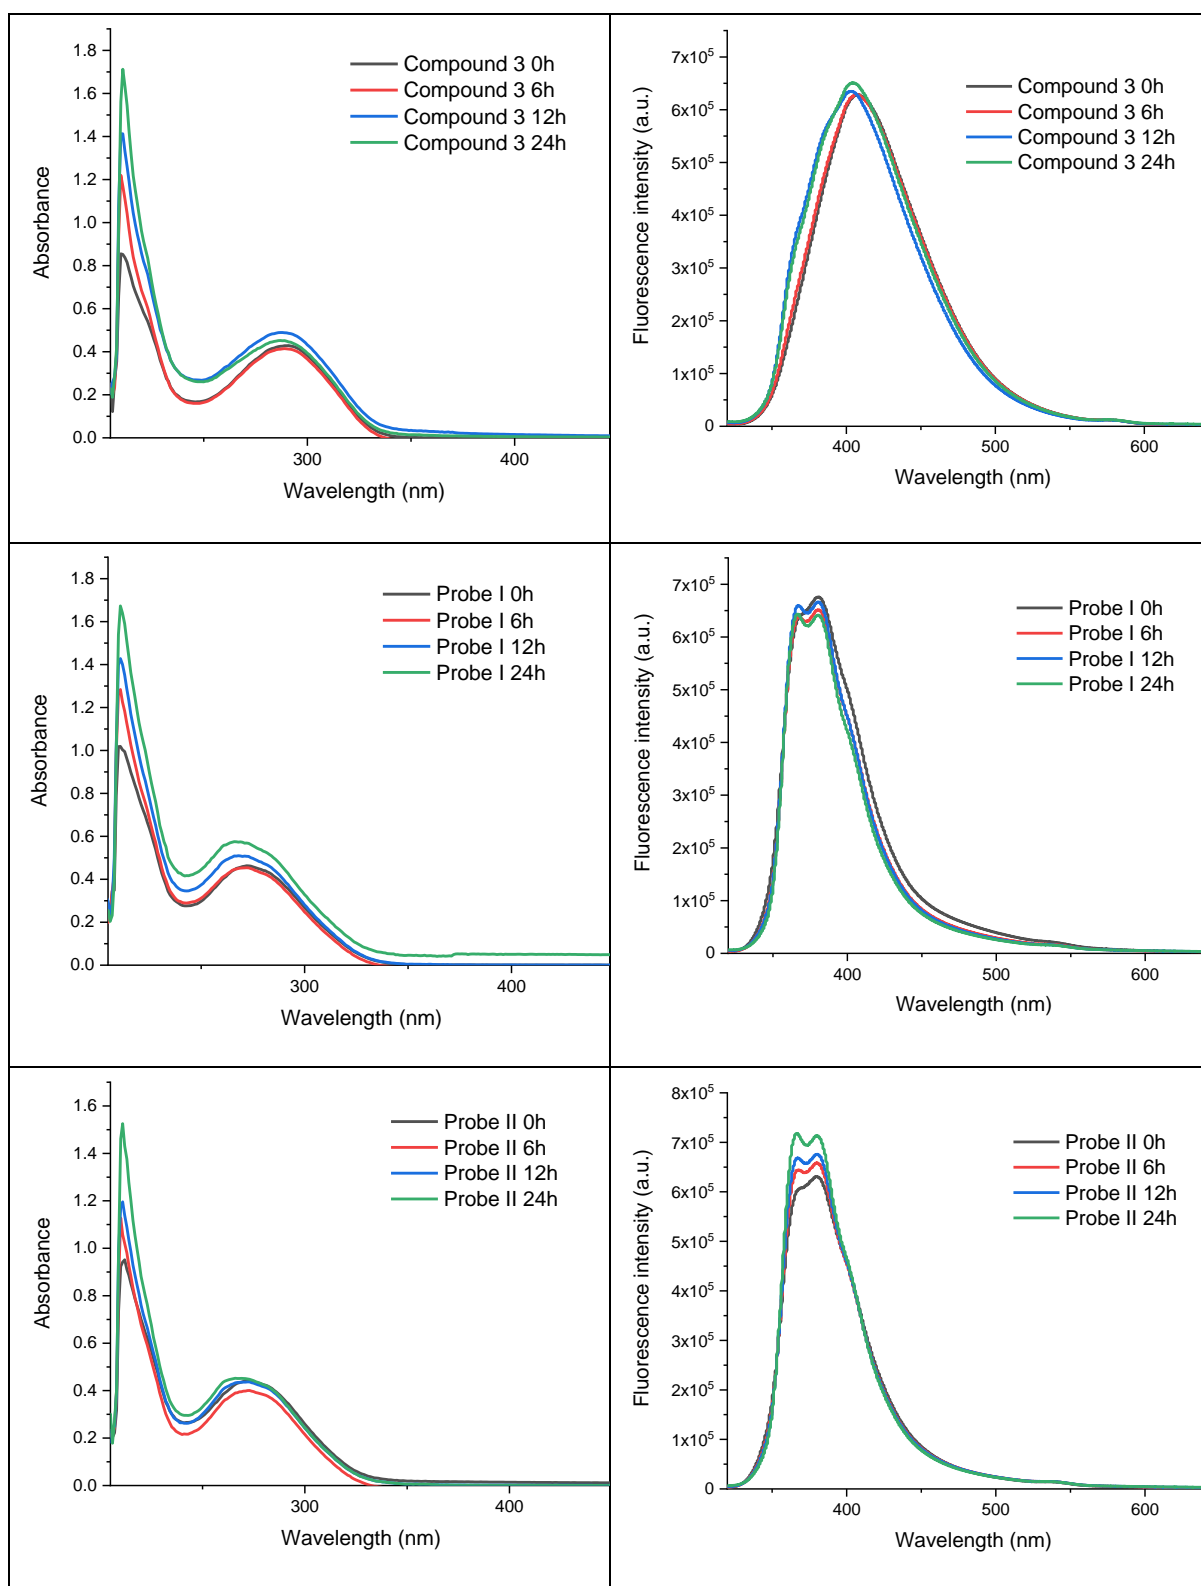

**Figure S17:** UV-Vis and emission spectra of monomer and the probes **I** & **II** in THF solution at different interval of time.

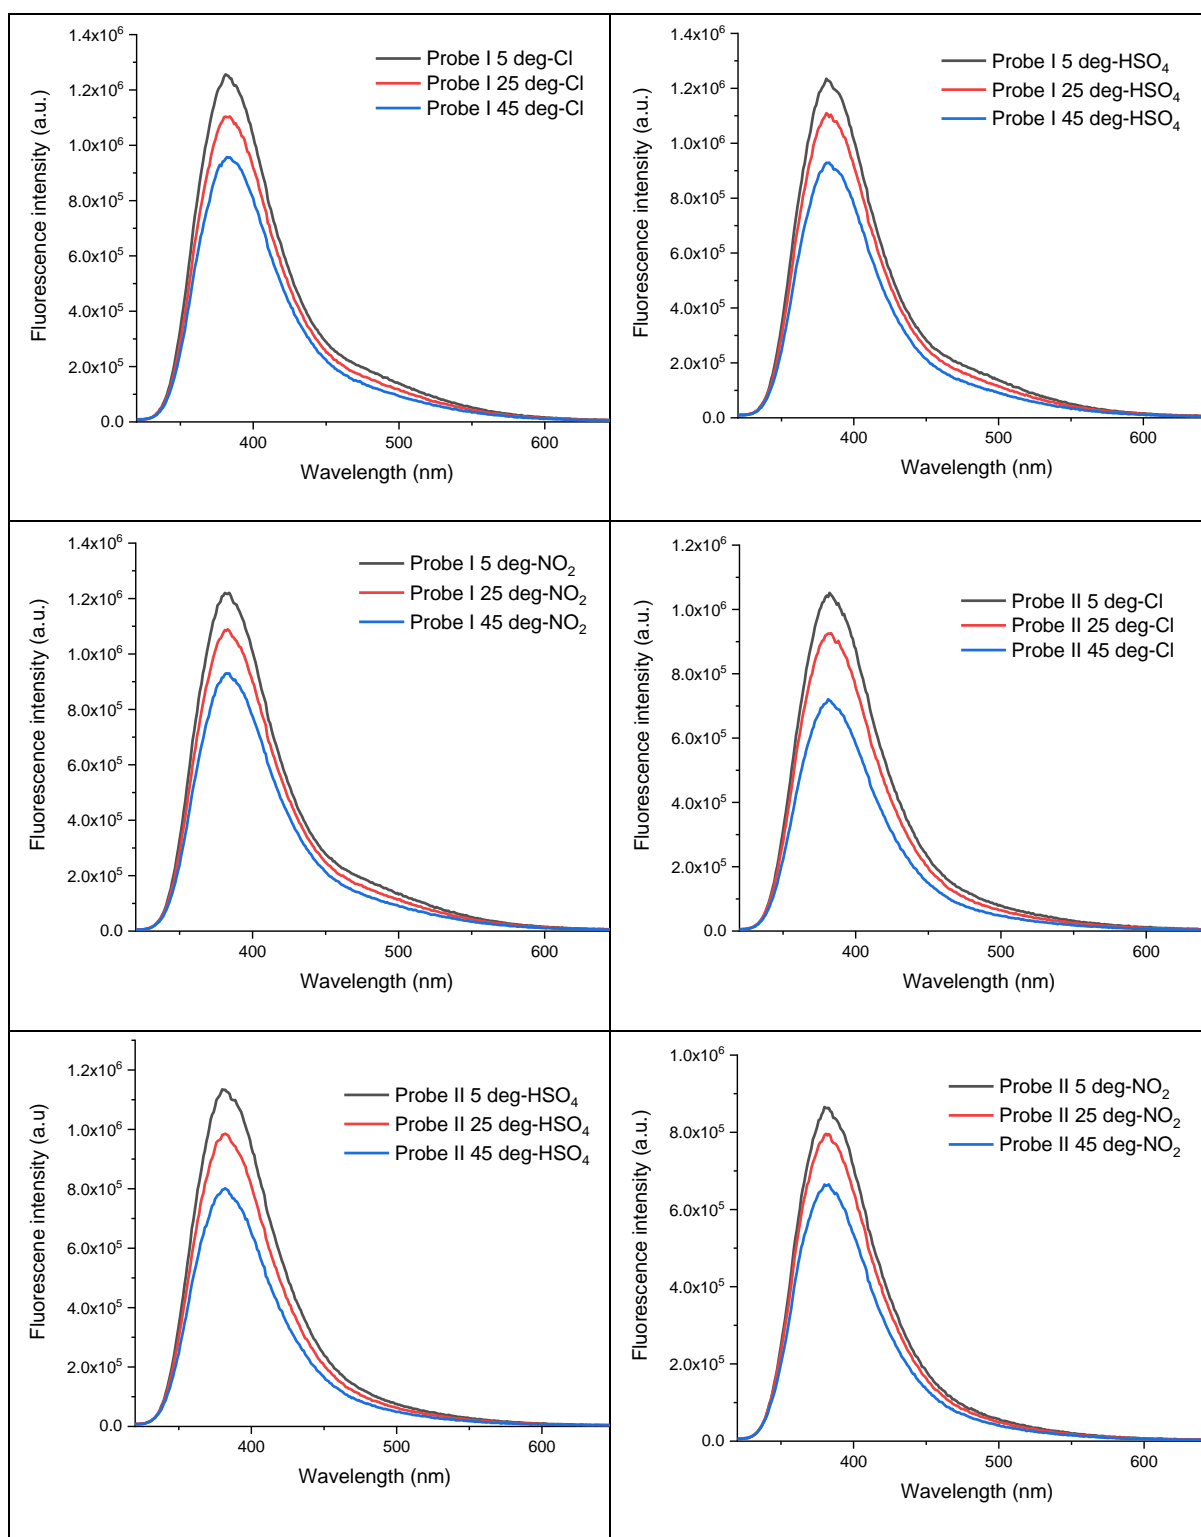

**Figure S18:** Emission spectra of probes I & II along with different ions in THF solution at different three different temperatures.

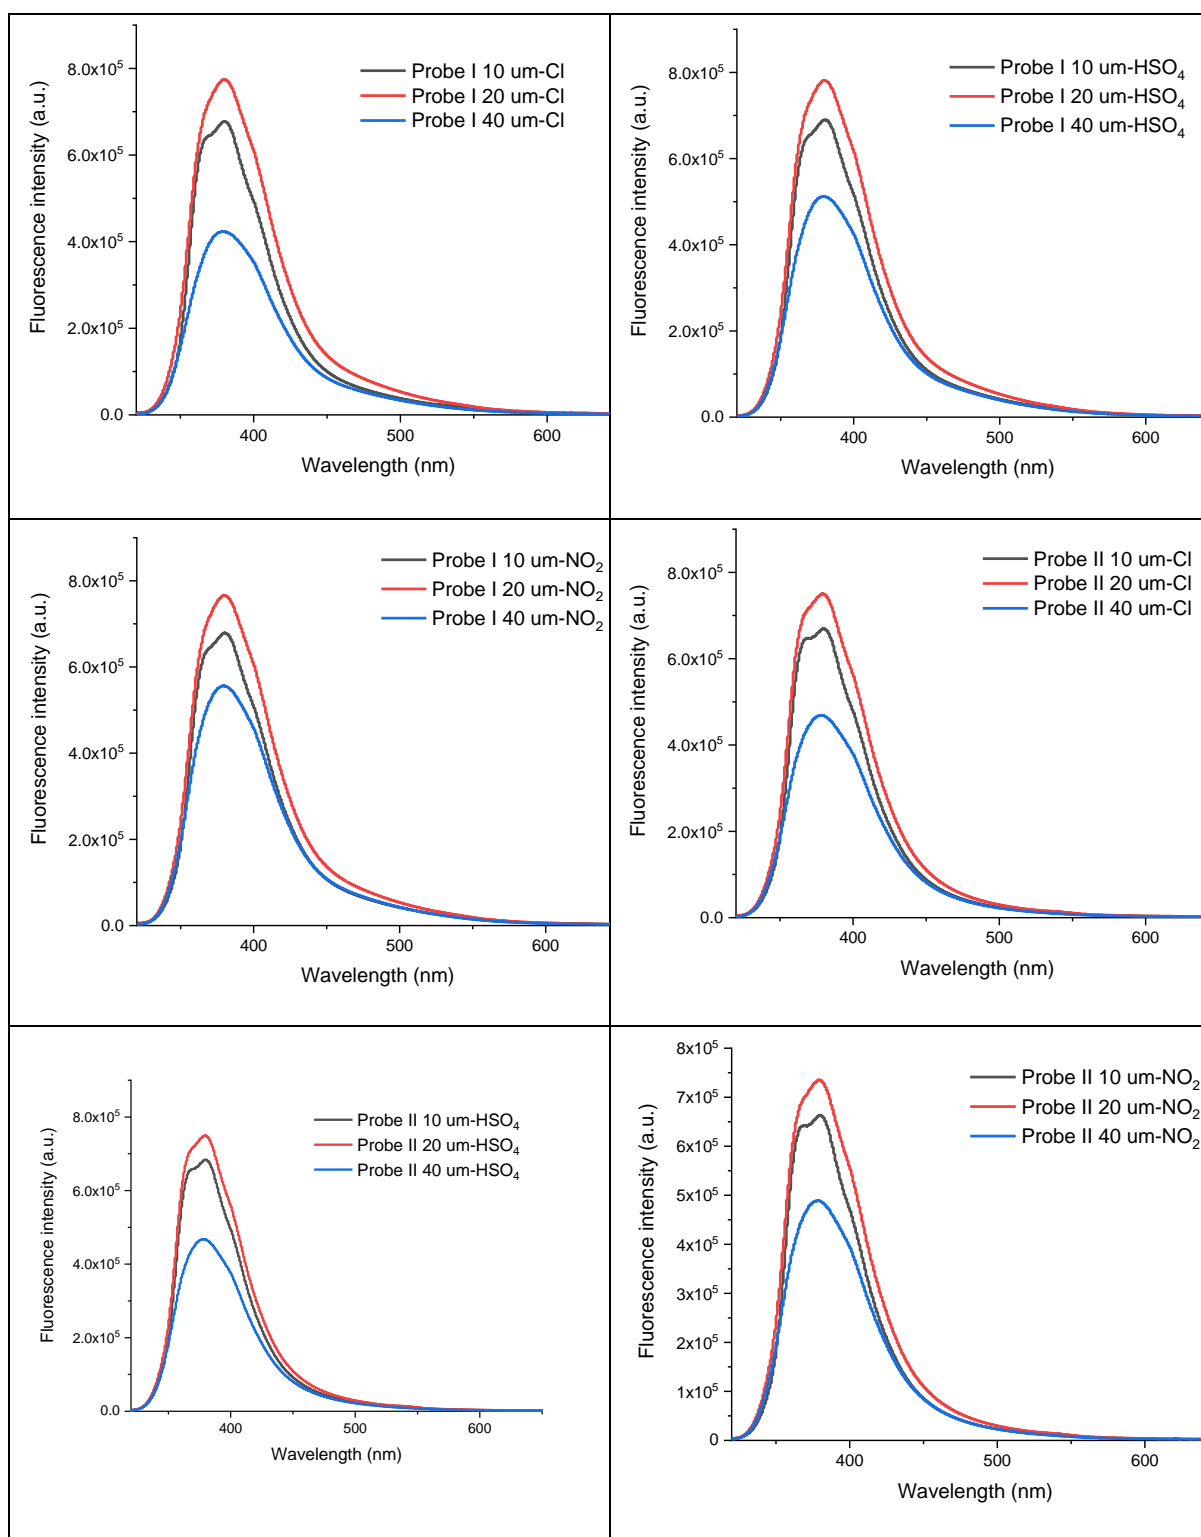

**Figure S19:** Emission spectra of probes I & II along with different ions in THF solution at different concentrations.

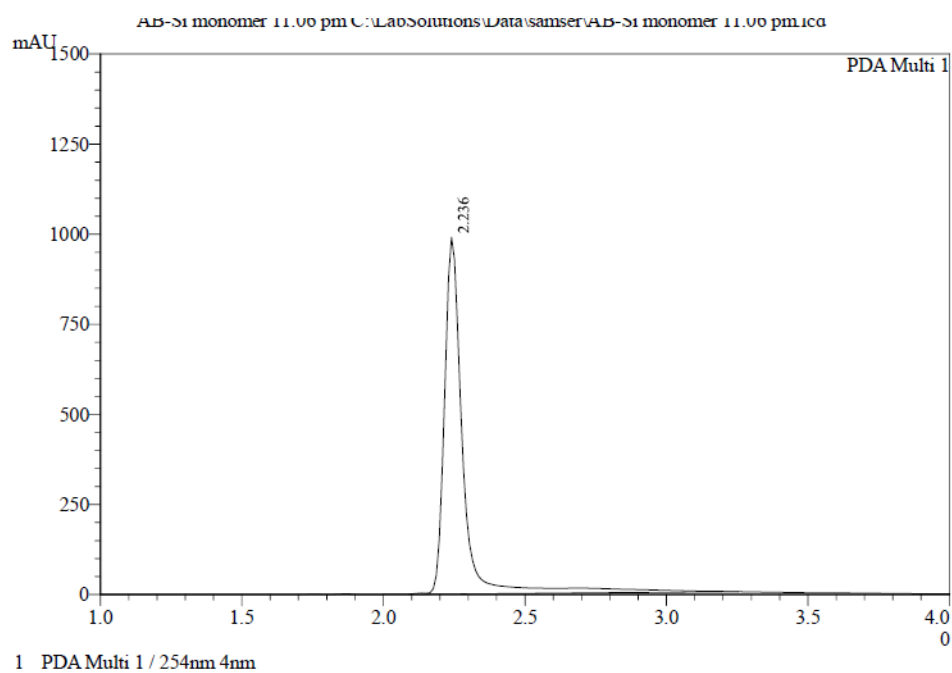

PeakTable C:\LabSolutions\Data\samser\AB-Si monomer 11.06 pm.lcd

PDA Ch1 254nm 4nm

| Peak# | Ret. Time | Area    | Height | Area %  | Height % |
|-------|-----------|---------|--------|---------|----------|
| 1     | 2.236     | 4519577 | 989310 | 100.000 | 100.000  |
| Total |           | 4519577 | 989310 | 100.000 | 100.000  |

**Figure S20:** HPLC trace of compound **3**.
